# Supplementary material for: Can Kohn–Sham density functional theory predict accurate charge distributions for both single-reference and multi-reference molecules?
Source: Royal Society of Chemistry journal article supplement (doi:10.1039/c7cp01576c), 2017-01-01
Supplement: c7cp01576c1.pdf [file c7cp01576c1.pdf]

ELECTRONIC SUPPLEMENTARY INFORMATION

for

**Can Kohn-Sham Density Functional Theory Predict Accurate Charge  
Distributions for Both Single-Reference and Multi-Reference  
Molecules?**

Pragya Verma and Donald G. Truhlar\*

*Department of Chemistry, Nanoporous Materials Genome Center, Chemical Theory Center,  
and Minnesota Supercomputing Institute, 207 Pleasant Street SE,  
University of Minnesota, Minneapolis, MN 55455-0431*

\*E-mail: truhlar@umn.edu

Date and time of finalization of Supporting Information: March 10, 2017, 7:00 pm.

**Table of Contents**

| <b>Item</b> | <b>Description</b>                               | <b>Page</b> |
|-------------|--------------------------------------------------|-------------|
| Table S1    | Comparison of def2-TZVP and def2-QZVP basis sets | S-2         |
| Table S2    | Spin-splitting energies using M06-L/def2-QZVP    | S-4         |
| Table S3    | Dipole moments of CuO, CuF, MgO, PbO and PbS     | S-5         |

**Table S1.** Comparison of def2-TZVP and def2-QZVP basis sets for dipole moments (in D) of 21 molecules calculated with 13 density functionals.

| molecule          | BLYP | GAM  | HCTH/407 | HLE16 | HSE06 | M06-L | M11-L | MN15-L | PBE  | PBE0 | PBEsol | TPSS | HLE17 | Expt. |
|-------------------|------|------|----------|-------|-------|-------|-------|--------|------|------|--------|------|-------|-------|
| <b>def2-TZVP</b>  |      |      |          |       |       |       |       |        |      |      |        |      |       |       |
| CrO               | 3.79 | 3.71 | 3.94     | 4.52  | 4.23  | 4.12  | 4.40  | 4.40   | 3.68 | 4.26 | 3.59   | 3.85 | 4.50  | 3.88  |
| CuF               | 4.67 | 4.92 | 4.97     | 5.76  | 5.33  | 4.90  | 4.98  | 5.04   | 4.69 | 5.37 | 4.62   | 4.81 | 5.57  | 5.77  |
| CuO               | 4.19 | 4.25 | 4.42     | 5.07  | 4.75  | 4.50  | 4.55  | 4.51   | 4.26 | 4.79 | 4.25   | 4.40 | 4.98  | 4.45  |
| H <sub>2</sub> CO | 2.21 | 2.15 | 2.15     | 2.27  | 2.32  | 2.08  | 1.96  | 2.16   | 2.16 | 2.31 | 2.16   | 2.23 | 2.41  | 2.33  |
| H <sub>2</sub> O  | 2.03 | 2.01 | 2.01     | 2.00  | 2.07  | 2.03  | 2.01  | 2.03   | 2.04 | 2.07 | 2.07   | 2.04 | 2.01  | 1.85  |
| H <sub>2</sub> S  | 1.07 | 1.15 | 1.13     | 1.13  | 1.16  | 1.13  | 1.07  | 1.18   | 1.13 | 1.16 | 1.17   | 1.13 | 1.07  | 0.98  |
| HCN               | 2.95 | 2.92 | 2.92     | 2.95  | 3.04  | 2.94  | 2.92  | 3.01   | 2.93 | 3.03 | 2.96   | 2.96 | 2.98  | 2.99  |
| HF                | 1.90 | 1.88 | 1.89     | 1.87  | 1.93  | 1.89  | 1.85  | 1.90   | 1.90 | 1.93 | 1.92   | 1.90 | 1.89  | 1.83  |
| HfO <sub>2</sub>  | 7.44 | 7.40 | 7.45     | 7.61  | 8.09  | 8.01  | 7.90  | 8.06   | 7.44 | 8.10 | 7.42   | 7.71 | 8.01  | 7.92  |
| HfO               | 3.39 | 3.24 | 3.49     | 4.15  | 3.46  | 3.16  | 3.29  | 3.55   | 3.24 | 3.43 | 3.20   | 3.47 | 4.49  | 3.43  |
| LaO               | 4.33 | 3.78 | 3.70     | 5.32  | 4.10  | 3.87  | 4.39  | 3.96   | 3.99 | 4.00 | 3.95   | 3.94 | 5.32  | 3.21  |
| N <sub>2</sub> O  | 0.09 | 0.22 | 0.18     | 0.19  | 0.02  | 0.17  | 0.18  | 0.06   | 0.16 | 0.02 | 0.20   | 0.10 | 0.02  | 0.16  |
| NH <sub>3</sub>   | 1.67 | 1.66 | 1.67     | 1.57  | 1.69  | 1.70  | 1.72  | 1.71   | 1.70 | 1.69 | 1.71   | 1.70 | 1.58  | 1.47  |
| PbO               | 4.41 | 4.44 | 4.39     | 4.79  | 4.67  | 4.55  | 4.22  | 4.49   | 4.32 | 4.66 | 4.24   | 4.40 | 4.95  | 4.64  |
| PbS               | 3.88 | 3.99 | 4.01     | 4.42  | 4.11  | 4.25  | 3.82  | 4.27   | 3.89 | 4.15 | 3.75   | 4.04 | 4.51  | 3.59  |
| PH <sub>3</sub>   | 0.57 | 0.70 | 0.67     | 0.75  | 0.69  | 0.65  | 0.55  | 0.66   | 0.65 | 0.70 | 0.70   | 0.68 | 0.69  | 0.57  |
| SO <sub>2</sub>   | 1.69 | 1.54 | 1.57     | 1.50  | 1.70  | 1.56  | 1.49  | 1.53   | 1.60 | 1.69 | 1.58   | 1.60 | 1.64  | 1.63  |
| TiO               | 3.71 | 3.43 | 3.39     | 4.52  | 3.86  | 3.80  | 3.80  | 3.76   | 3.54 | 3.81 | 3.47   | 3.67 | 3.88  | 2.96  |
| YO                | 4.72 | 4.35 | 4.10     | 4.08  | 4.65  | 4.64  | 4.00  | 4.59   | 4.41 | 4.55 | 4.39   | 4.44 | 4.34  | 4.52  |
| ZrO <sub>2</sub>  | 7.49 | 7.41 | 7.38     | 7.25  | 7.93  | 7.94  | 7.77  | 8.01   | 7.45 | 7.92 | 7.42   | 7.68 | 7.72  | 7.8   |
| ZrO               | 3.19 | 2.90 | 3.17     | 3.98  | 3.37  | 3.19  | 3.14  | 3.12   | 3.12 | 3.39 | 3.04   | 3.40 | 4.54  | 2.55  |
| <b>def2-QZVP</b>  |      |      |          |       |       |       |       |        |      |      |        |      |       |       |
| CrO               | 3.66 | 3.66 | 3.93     | 4.56  | 4.09  | 3.99  | 4.08  | 4.25   | 3.54 | 4.13 | 3.45   | 3.73 | 4.48  | 3.88  |
| CuF               | 4.55 | 4.84 | 4.83     | 5.59  | 5.21  | 4.81  | 4.75  | 4.94   | 4.56 | 5.25 | 4.49   | 4.66 | 5.41  | 5.77  |
| CuO               | 4.16 | 4.23 | 4.35     | 4.99  | 4.69  | 4.47  | 4.42  | 4.47   | 4.22 | 4.74 | 4.21   | 4.35 | 4.90  | 4.45  |
| H <sub>2</sub> CO | 2.25 | 2.19 | 2.20     | 2.29  | 2.35  | 2.11  | 2.00  | 2.22   | 2.21 | 2.34 | 2.20   | 2.27 | 2.42  | 2.33  |
| H <sub>2</sub> O  | 1.87 | 1.84 | 1.87     | 1.88  | 1.91  | 1.85  | 1.85  | 1.87   | 1.87 | 1.91 | 1.89   | 1.87 | 1.87  | 1.85  |
| H <sub>2</sub> S  | 0.98 | 1.07 | 1.04     | 1.05  | 1.05  | 1.03  | 0.99  | 1.10   | 1.02 | 1.06 | 1.05   | 1.02 | 0.98  | 0.98  |
| HCN               | 2.96 | 2.94 | 2.95     | 2.96  | 3.04  | 2.92  | 2.93  | 3.03   | 2.95 | 3.04 | 2.97   | 2.96 | 2.98  | 2.99  |

|                    |             |            |                 |              |              |              |              |               |            |             |               |             |              |              |
|--------------------|-------------|------------|-----------------|--------------|--------------|--------------|--------------|---------------|------------|-------------|---------------|-------------|--------------|--------------|
| HF                 | 1.81        | 1.78       | 1.80            | 1.80         | 1.84         | 1.79         | 1.76         | 1.82          | 1.80       | 1.83        | 1.82          | 1.81        | 1.81         | 1.83         |
| HfO <sub>2</sub>   | 7.45        | 7.42       | 7.47            | 7.56         | 8.06         | 7.92         | 7.79         | 8.10          | 7.44       | 8.07        | 7.41          | 7.68        | 7.95         | 7.92         |
| HfO                | 3.38        | 3.21       | 3.45            | 4.03         | 3.42         | 3.13         | 3.20         | 3.45          | 3.24       | 3.39        | 3.17          | 3.47        | 4.41         | 3.43         |
| LaO                | 4.25        | 3.77       | 3.59            | 4.81         | 3.94         | 3.79         | 4.19         | 3.79          | 3.88       | 3.84        | 3.82          | 3.81        | 5.03         | 3.21         |
| N <sub>2</sub> O   | 0.07        | 0.20       | 0.16            | 0.18         | 0.03         | 0.16         | 0.17         | 0.03          | 0.14       | 0.03        | 0.18          | 0.09        | 0.01         | 0.16         |
| NH <sub>3</sub>    | 1.52        | 1.51       | 1.53            | 1.48         | 1.55         | 1.54         | 1.55         | 1.56          | 1.54       | 1.55        | 1.55          | 1.53        | 1.47         | 1.47         |
| PbO                | 4.51        | 4.56       | 4.50            | 4.83         | 4.73         | 4.64         | 4.26         | 4.62          | 4.40       | 4.73        | 4.30          | 4.45        | 4.97         | 4.64         |
| PbS                | 3.92        | 4.08       | 4.06            | 4.38         | 4.11         | 4.25         | 3.79         | 4.35          | 3.90       | 4.15        | 3.75          | 4.02        | 4.45         | 3.59         |
| PH <sub>3</sub>    | 0.53        | 0.67       | 0.63            | 0.72         | 0.65         | 0.63         | 0.56         | 0.65          | 0.60       | 0.66        | 0.64          | 0.63        | 0.65         | 0.57         |
| SO <sub>2</sub>    | 1.66        | 1.50       | 1.55            | 1.49         | 1.65         | 1.49         | 1.44         | 1.50          | 1.57       | 1.65        | 1.55          | 1.57        | 1.62         | 1.63         |
| TiO                | 3.48        | 3.15       | 3.15            | 4.37         | 3.52         | 3.39         | 3.15         | 3.39          | 3.26       | 3.45        | 3.19          | 3.37        | 3.71         | 2.96         |
| YO                 | 4.71        | 4.25       | 4.04            | 4.02         | 4.58         | 4.43         | 3.82         | 4.58          | 4.38       | 4.48        | 4.34          | 4.36        | 4.23         | 4.52         |
| ZrO <sub>2</sub>   | 7.45        | 7.37       | 7.34            | 7.15         | 7.85         | 7.83         | 7.64         | 8.00          | 7.39       | 7.85        | 7.36          | 7.60        | 7.61         | 7.8          |
| ZrO                | 3.15        | 2.83       | 3.10            | 3.74         | 3.27         | 2.90         | 2.87         | 3.05          | 3.07       | 3.30        | 2.97          | 3.33        | 4.36         | 2.55         |
| MUE <sup>a,b</sup> | 0.30        | 0.27       | 0.26            | 0.49         | 0.28         | 0.27         | 0.31         | 0.28          | 0.29       | 0.27        | 0.30          | 0.26        | 0.46         | 0.00         |
| MUE <sup>a,c</sup> | 0.27        | 0.24       | 0.22            | 0.44         | 0.21         | 0.20         | 0.25         | 0.22          | 0.26       | 0.21        | 0.27          | 0.23        | 0.42         | 0.00         |
|                    | <b>BLYP</b> | <b>GAM</b> | <b>HCTH/407</b> | <b>HLE16</b> | <b>HSE06</b> | <b>M06-L</b> | <b>M11-L</b> | <b>MN15-L</b> | <b>PBE</b> | <b>PBE0</b> | <b>PBEsol</b> | <b>TPSS</b> | <b>HLE17</b> | <b>Expt.</b> |

<sup>a</sup>MUE = mean unsigned error

<sup>b</sup>def2-TZVP

<sup>c</sup>def2-QZVP

**Table S2.** Spin-splitting energies ( $\Delta E$  in kcal/mol),<sup>a</sup>  $\langle S^2 \rangle$  values, and dipole moments (in D) using M06-L/def2-QZVP.

| molecule         | spin state | $\Delta E$ | $\langle S^2 \rangle$ | dipole moment |
|------------------|------------|------------|-----------------------|---------------|
| CrN              | quartet    | 0.0        | 4.07                  | 3.06          |
|                  | doublet    | 12.9       | 1.93                  | 2.38          |
| CrO              | quintet    | 0.0        | 6.16                  | 3.99          |
|                  | triplet    | 14.8       | 2.77                  | 2.29          |
| CuF              | singlet    | 0.0        | <sup>-b</sup>         | 4.81          |
|                  | triplet    | 42.5       | 2.00                  | 1.95          |
| CuO              | doublet    | 0.0        | 0.77                  | 4.47          |
|                  | quartet    | 35.4       | 3.77                  | 0.11          |
| HfO <sub>2</sub> | singlet    | 0.0        | <sup>-b</sup>         | 7.92          |
|                  | triplet    | 34.0       | 2.03                  | 4.45          |
| HfO              | singlet    | 0.0        | <sup>-b</sup>         | 3.13          |
|                  | triplet    | 27.8       | 2.00                  | 4.71          |
| LaO              | doublet    | 0.0        | 0.75                  | 3.79          |
|                  | quartet    | 77.9       | 3.76                  | 3.23          |
| TiO              | triplet    | 0.0        | 2.02                  | 3.39          |
|                  | singlet    | -0.8       | 0.94                  | 2.84          |
| YO               | doublet    | 0.0        | 0.75                  | 4.43          |
|                  | quartet    | 79.7       | 3.76                  | 3.14          |
| ZrO <sub>2</sub> | singlet    | 0.0        | <sup>-b</sup>         | 7.83          |
|                  | triplet    | 49.0       | 2.03                  | 4.15          |
| ZrO              | singlet    | 0.0        | 0.80                  | 2.90          |
|                  | triplet    | 9.0        | 2.00                  | 3.77          |
| FeO              | quintet    | 0.0        | 6.11                  | 4.31          |
|                  | triplet    | 24.5       | 3.03                  | 4.21          |
| NiH              | doublet    | 0.0        | 0.77                  | 2.48          |
|                  | quartet    | 33.8       | 3.75                  | 0.41          |
| ScF              | singlet    | 0.0        | 0.74                  | 2.29          |
|                  | triplet    | 11.9       | 2.00                  | 2.71          |
| TiH              | quartet    | 0.0        | 3.76                  | 3.64          |
|                  | doublet    | 4.4        | 1.59                  | 2.33          |
| VN               | triplet    | 0.0        | 2.07                  | 4.12          |
|                  | singlet    | 5.8        | 1.03                  | 2.82          |
| VO               | quartet    | 0.0        | 3.81                  | 3.32          |
|                  | doublet    | 10.6       | 1.75                  | 2.42          |

<sup>a</sup>For each molecule,  $\Delta E$  is calculated with respect to the energy of the experimental ground spin state.

<sup>b</sup>These singlet calculations were restricted Kohn-Sham calculations.

**Table S3.** Dipole moments (in D) of CuF, CuO, MgO, PbO and PbS calculated with 47 density functionals and the def2-QZVP basis set.

| <b>Functional</b> | <b>CuF</b> | <b>CuO</b> | <b>MgO</b> | <b>PbO</b> | <b>PbS</b> |
|-------------------|------------|------------|------------|------------|------------|
| BLYP              | 4.55       | 4.16       | 6.95       | 4.51       | 3.92       |
| PBE               | 4.56       | 4.22       | 7.04       | 4.40       | 3.90       |
| HCTH/407          | 4.83       | 4.35       | 7.23       | 4.50       | 4.06       |
| OLYP              | 4.77       | 4.34       | 7.14       | 4.47       | 4.09       |
| PBEsol            | 4.49       | 4.21       | 7.10       | 4.30       | 3.75       |
| OreLYP            | 4.72       | 4.30       | 7.10       | 4.44       | 4.05       |
| SOGGA11           | 4.71       | 4.59       | 7.76       | 4.43       | 4.38       |
| HLE16             | 5.59       | 4.99       | 8.16       | 4.83       | 4.38       |
| N12               | 4.79       | 4.22       | 7.12       | 4.55       | 3.98       |
| GAM               | 4.84       | 4.23       | 7.02       | 4.56       | 4.08       |
| $\tau$ -HCTH      | 4.92       | 4.48       | 7.38       | 4.44       | 3.95       |
| TPSS              | 4.66       | 4.35       | 7.21       | 4.45       | 4.02       |
| M06-L             | 4.81       | 4.47       | 7.09       | 4.64       | 4.25       |
| M11-L             | 4.75       | 4.42       | 7.20       | 4.26       | 3.79       |
| MGGA_MS2          | 4.50       | 4.21       | 6.88       | 4.24       | 3.85       |
| HLE17             | 5.41       | 4.90       | 7.91       | 4.97       | 4.45       |
| MN12-L            | 4.74       | 4.44       | 7.08       | 4.25       | 3.88       |
| MN15-L            | 4.94       | 4.47       | 7.27       | 4.62       | 4.35       |
| BHandHLYP         | 5.78       | 5.28       | 8.11       | 5.13       | 4.40       |
| B3LYP             | 5.12       | 4.59       | 7.45       | 4.78       | 4.12       |
| B1LYP             | 5.24       | 4.68       | 7.52       | 4.85       | 4.18       |
| mPW1PW            | 5.26       | 4.76       | 7.71       | 4.74       | 4.15       |
| B97-1             | 5.20       | 4.70       | 7.53       | 4.75       | 4.21       |
| PBE0              | 5.25       | 4.74       | 7.67       | 4.73       | 4.15       |
| MPW1K             | 5.66       | 5.18       | 8.19       | 4.95       | 4.31       |
| B3LYP*            | 4.97       | 4.48       | 7.34       | 4.70       | 4.05       |
| CAM-B3LYP         | 5.31       | 4.87       | 7.93       | 4.92       | 4.24       |
| MPW3LYP           | 5.14       | 4.61       | 7.48       | 4.79       | 4.12       |
| B97-3             | 5.38       | 4.85       | 7.57       | 4.89       | 4.36       |
| LC- $\omega$ PBE  | 5.41       | 5.14       | 8.63       | 4.93       | 4.42       |
| HSE06             | 5.21       | 4.69       | 7.64       | 4.73       | 4.11       |
| SOGGA11-X         | 5.49       | 4.95       | 7.95       | 4.98       | 4.33       |
| N12-SX            | 5.20       | 4.75       | 7.79       | 4.82       | 4.21       |
| $\tau$ -HCTHhyb   | 5.05       | 4.58       | 7.53       | 4.63       | 4.04       |
| TPSSh             | 4.94       | 4.54       | 7.45       | 4.58       | 4.11       |
| MPWB1K            | 5.64       | 5.14       | 8.04       | 4.96       | 4.26       |
| M05               | 5.37       | 4.77       | 7.82       | 5.01       | 4.45       |
| M05-2X            | 5.82       | 5.37       | 8.32       | 5.21       | 4.38       |
| PW6B95            | 5.31       | 4.77       | 7.61       | 4.82       | 4.15       |
| M06-HF            | 6.33       | 6.03       | 9.09       | 5.35       | 4.20       |
| M06               | 5.15       | 4.58       | 7.62       | 4.93       | 4.24       |
| M06-2X            | 5.80       | 5.33       | 7.94       | 5.26       | 4.59       |
| M08-HX            | 5.98       | 5.53       | 8.41       | 5.36       | 4.71       |

|         |      |      |      |      |      |
|---------|------|------|------|------|------|
| M08-SO  | 5.94 | 5.40 | 7.92 | 5.15 | 4.24 |
| M11     | 6.04 | 5.67 | 9.17 | 5.10 | 4.31 |
| MN12-SX | 5.39 | 4.91 | 7.60 | 4.65 | 3.97 |
| MN15    | 5.45 | 5.00 | 7.67 | 4.82 | 4.13 |
| Expt.   | 5.77 | 4.45 | 6.2  | 4.64 | 3.59 |
